# Supplementary material
Source: ML conference proceedings conference paper supplement (https://openaccess.thecvf.com/content/CVPR2021/html/Chen_GeoSim_Realistic_Video_CVPR_2021_paper.html)
Supplement: Supplementary file 2 [file Chen_GeoSim_Realistic_Video_CVPR_2021_supplemental.zip]

Archive with 2 entries (2 files):
- supp_video.mp4
- supp_geosim.pdf
